1       **Title:** Patient satisfaction: Insights from the regional referral hospitals in Bhutan

2       **Short title:** Patient satisfaction in Bhutan.

3       Kuenzang Dorji <sup>1¶\*</sup>, Kinga Jamphel <sup>2¶</sup>, Jigme Kelzang, <sup>1¶</sup> Ugyen Pelmo <sup>3&</sup>, Hem Kumar Nepal<sup>4&</sup>, Sonam Zangpo<sup>1&</sup>,  
4       Sonam Wangdi <sup>5&</sup>, Karma Galey<sup>1¶</sup>.

5

6       <sup>1</sup> Health Service Quality Assurance Division, Department of Health Service, Ministry of Health, Royal  
7       Government of Bhutan, Thimphu, Bhutan.

8       <sup>2</sup> Department of Health Service, Ministry of Health, Royal Government of Bhutan, Thimphu, Bhutan.

9       <sup>3</sup> Quality Assurance Unit, Gelephu Central Regional Referral Hospital, National Medical Services, Ministry of  
10       Health, Royal Government of Bhutan, Gelephu, Bhutan.

11       <sup>4</sup> Quality Assurance Unit, Mongar Eastern Regional Referral Hospital, National Medical Services, Ministry of  
12       Health, Royal Government of Bhutan, Mongar, Bhutan.

13       <sup>5</sup> Policy Planning Division, Secretariat, Ministry of Health, Royal Government of Bhutan, Thimphu, Bhutan.

14

15

16       \* Corresponding Author

17       Email: [kuenzangdbiomed@gmail.com](mailto:kuenzangdbiomed@gmail.com) (KD)

18

19       ¶ <sup>1</sup> 1<sup>st</sup> set of equal contributors

20       & <sup>2</sup> 2<sup>nd</sup> set of equal contributors

21

## 22        **Abstract**

23        Patient satisfaction is crucial for evaluating healthcare quality and guiding continuous quality  
24        improvement. Globally, patient satisfaction has been extensively studied; however, there is  
25        limited research on this topic in Bhutan, where the healthcare system is in the early stages of  
26        developing a quality-oriented culture. To address this gap, we aimed to evaluate patient  
27        satisfaction levels among different socio-demographic and clinical groups and identify the  
28        predictors of patient satisfaction in Bhutan.

29        We retrospectively analysed archived patient satisfaction data from two tertiary healthcare  
30        centres in Bhutan: Mongar Eastern Regional Referral Hospital and Gelephu Central Regional  
31        Referral Hospital. The routine survey was conducted throughout April 2024 using a modified  
32        version of the Patient Satisfaction Questionnaire 18. The data were analysed using descriptive  
33        statistics, one-way ANOVA, and binary logistic regression.

34        Our study revealed significant variations in patient satisfaction across socio-demographic and  
35        clinical groups. Ethnicity, occupation, and education level emerged as significant predictors of  
36        satisfaction. Sharchop and other ethnic groups; farmers, religious personnel, and other  
37        occupational groups; and illiterate individuals exhibited significantly higher satisfaction levels.  
38        While patient type, age, and marital status influenced satisfaction levels, they did not emerge as  
39        significant predictors when considering other variables. Overall, patient satisfaction in Bhutan  
40        was high, particularly in the financial domain; however, accessibility and convenience scored the  
41        lowest.

42        Our findings underscore the importance of addressing socio-demographic disparities in patient  
43        satisfaction. With anticipated changes in the socio-demographic characteristics of the  
44        Bhutanese population, satisfaction levels may decline. Therefore, healthcare policy and

45 decision-makers should implement targeted interventions to address these shifts. To enhance  
46 overall satisfaction, healthcare policymakers should focus on improving accessibility and  
47 convenience. Strategies such as establishing dynamic limits on free services, exploring private  
48 sector engagement in high-end services, and strengthening the healthcare workforce are  
49 essential for sustainable and quality healthcare service delivery.

## 50 **Introduction**

51 Globally, the healthcare system is evolving to prioritise patient-centred care as a fundamental  
52 aspect of healthcare delivery and therefore meeting patient's needs is imperative. This shift has  
53 emphasized the necessity of placing a strong focus on fulfilling the patient's preferences, needs,  
54 and values to provide quality healthcare [1–3]. Starting from the early 1980s, there have been  
55 ongoing efforts to comprehend and measure patient satisfaction, and gradually, it has been  
56 acknowledged as a crucial component in delivering quality healthcare [4]. However, there is still  
57 no consensus on a universally accepted definition of patient satisfaction [5,6]. Patient  
58 satisfaction is influenced by several factors, such as technique, functionality, infrastructure,  
59 interaction, environment, and services, making it multidimensional and subjective [3,6,7].  
60 Moreover, factors inherent to patients, such as age, education level, and health status, which  
61 healthcare professionals and managers cannot control, exert an influence on patient  
62 satisfaction, adding further complexity to the matter [3]. Despite the ambiguity, in many  
63 countries with advanced healthcare systems, patient satisfaction has been used as a standard  
64 measure of healthcare quality [8–10]. Assessing the quality of healthcare services from the  
65 patient's viewpoint is essential because they are the ultimate beneficiaries of the healthcare  
66 services [3]. Patient feedback can assist in recognizing unfulfilled patient needs, providing

67 healthcare managers and professionals with valuable guidance for continuous quality  
68 improvement [7,10].

69 Bhutan, nestled between India and China, established its modern healthcare system in the  
70 1960s. The present healthcare system is state-funded and structured into three tiers. It consists  
71 of national or regional referral hospitals at the tertiary level, district hospitals at the secondary  
72 level, and primary healthcare centres and outreach clinics at the primary level [11]. Since 2002,  
73 the Ministry of Health (MoH, Royal Government of Bhutan) has strengthened its emphasis on  
74 delivering quality and safe healthcare services. The MoH, in collaboration with the Bhutan  
75 Standard Bureau (Ministry of Industry, Commerce, and Employment, Royal Government of  
76 Bhutan), developed and published the Bhutan Healthcare Standard for Quality Assurance  
77 (BHSQA), a nation's first healthcare standard in 2018. The BHSQA contains 116 standards, 639  
78 objective elements, and 67 key performance indicators covering both clinical and managerial  
79 structures, processes, and outcomes. To raise the quality and safety of healthcare services to  
80 the desired level, the Health Service Quality Assurance Division of the MoH gradually  
81 implemented the BHSQA across all healthcare centres in the country.

82 At present, the Bhutanese healthcare system is in its early stages of developing a culture  
83 focused on quality and safety, necessitating constant vigilance and evaluation of its  
84 advancement. As a result, each healthcare centre across the nation is required to evaluate  
85 healthcare quality and safety using BHSQA key performance indicators, which include assessing  
86 patient satisfaction. To gauge patient satisfaction, Bhutanese healthcare centres utilize the  
87 Patient Satisfaction Questionnaire 18 (PSQ-18), a meticulously developed tool recognized for its  
88 brevity and efficacy across various contexts [10,12,13]. However, due to various challenges,  
89 published reports on patient satisfaction in Bhutan are scarce. This deficiency hampers the  
90 development and implementation of targeted interventions necessary for establishing an

91 effective, efficient, and responsive healthcare system. To address this gap, this study aims to  
92 evaluate patient satisfaction levels among different socio-demographic and clinical groups and  
93 identify the predictors of patient satisfaction in Bhutan.

## 94 **Materials and methods**

95 This study retrospectively analysed patient satisfaction survey responses collected from Mongar  
96 Eastern Regional Referral Hospital (MERRH) and Gelephu Central Regional Referral Hospital  
97 (GCRRH). The routine paper-based surveys were conducted throughout April 2024. The survey  
98 responses were subjected to basic analysis for continuous quality improvement and archived in  
99 the quality assurance units of respective hospitals.

100 The survey sought voluntary feedback on service satisfaction from inpatients and outpatients  
101 aged 18 and above. The survey used a modified version of the PSQ-18 questionnaire, comprising  
102 two sections: patient details and satisfaction indicators. The patient details section encompasses  
103 eight socio-demographic and clinical variables across 33 subgroups, while the satisfaction  
104 indicators section evaluates seven domains per the standard PSQ-18. In the satisfaction  
105 indicator questionnaire, the term "doctor" has been replaced with "healthcare professional" or  
106 "healthcare centre" to ensure a comprehensive evaluation of service quality. The responses  
107 were originally rated on a 5-point Likert scale: 1 (strongly agree), 2 (agree), 3 (uncertain), 4  
108 (disagree), and 5 (strongly disagree).

109 Prior to analysis, data completeness and consistency were verified, and surveys lacking any  
110 information were excluded. The PSQ-18 consists of both negative and positively constructed  
111 questions and therefore to address inconsistencies in interpretation, the original Likert scale  
112 responses were re-scaled again on a 5-point Likert scale to ensure uniformity. This re-scaling

113 process adhered to the standard PSQ-18 conversion, where higher scores indicate greater  
114 satisfaction with healthcare services.

115 To assess differences in patient satisfaction levels among predefined groups in the survey, a  
116 one-way analysis of variance (ANOVA) was conducted. Subsequently, Dunnett grouping was  
117 applied to identify statistically distinct groups within these predefined groups.

118 The overall patient satisfaction score of individual patients, calculated as the average of all  
119 seven domain scores, was dichotomized into two categories: satisfied (scores above three) and  
120 dissatisfied (scores of three and below). Subsequently, binary logistic regression was performed  
121 to determine predictors of patient satisfaction among the newly established groups. The  
122 significance level was set at less than 0.005 for all statistical analyses. Descriptive statistics,  
123 including means and standard deviations were computed for each domain of patient satisfaction  
124 within each group. Data analysis was carried out using Minitab statistical software (version  
125 17.1).

126 The study was approved by the Research Ethics Board for Health, Ministry of Health, Royal  
127 Government of Bhutan. The same board waived the requirement for informed consent due to  
128 the retrospective nature of the study and the use of anonymised data. The archived data was  
129 accessed on 15<sup>th</sup> July 2024, and the authors did not have access to any information that could  
130 identify individual participants during or after data collection.

## 131 **Results**

132 A total of 471 survey responses were collected from MERRH and 454 from GCRRH. After a  
133 thorough review, six survey responses from MERRH and four from GCRRH were excluded due to  
134 incomplete data, resulting in 915 survey responses for the final analysis. The socio-demographic  
135 composition of the respondents is presented in Table 1.

136

**Table 1.** Socio-demographic and clinical profile of the respondents.

| Variables           | Groups                       | Total respondents (Percent) |
|---------------------|------------------------------|-----------------------------|
| Patient type        | Inpatient                    | 313 (34.21%)                |
|                     | Outpatient                   | 602 (65.79%)                |
| Age                 | 18-44 years                  | 648 (70.82%)                |
|                     | 45-64 years                  | 189 (20.66%)                |
|                     | 65-74 years                  | 43 (4.70%)                  |
|                     | ≥75 years                    | 35 (3.83%)                  |
| Sex                 | Male                         | 396 (43.28%)                |
|                     | Female                       | 519 (56.72%)                |
| Service utilisation | Once                         | 289 (31.59%)                |
|                     | More than once               | 626 (68.42%)                |
| Ethnic group        | Ngalop                       | 70 (7.65%)                  |
|                     | Lhotshampa                   | 209 (22.84%)                |
|                     | Sharchop                     | 522 (57.05%)                |
|                     | Others                       | 114 (12.46%)                |
| Marital status      | Unmarried                    | 179 (19.56%)                |
|                     | Married                      | 685 (74.86%)                |
|                     | Divorced                     | 33 (3.61%)                  |
|                     | Widowed                      | 18 (1.97%)                  |
| Occupation          | Religious personnel          | 14 (1.53%)                  |
|                     | Corporate                    | 19 (2.08%)                  |
|                     | Student                      | 77 (8.42%)                  |
|                     | Business                     | 146 (15.96%)                |
|                     | Civil servant                | 160 (17.49%)                |
|                     | Farmer                       | 268 (29.29%)                |
|                     | Others                       | 231 (25.24%)                |
| Education level     | Illiterate                   | 238 (26.01%)                |
|                     | Non-formal education         | 44 (4.81)                   |
|                     | Secondary education or lower | 417 (45.58%)                |
|                     | Certificate                  | 29 (3.17%)                  |
|                     | Diploma                      | 56 (6.12%)                  |
|                     | Bachelor                     | 88 (9.62%)                  |
|                     | Master                       | 11 (1.20%)                  |
| Other qualification | 32 (3.50%)                   |                             |

137

138

139

140

141

142

143

Among the survey respondents, 65.79% were outpatients and 34.21% were inpatients, with the majority (70.82%) aged between 18-44 years. Sex-wise, 56.72% of respondents were female and 43.28% were male, with 68.42% using healthcare services more than once. Regarding ethnicity, the majority of the respondents (57.05%) were Sharchop, while married individuals constituted the largest marital group (74.86%). The largest occupational group consisted of farmers (29.29%). Educationally, 45.58% had secondary education or lower, 26.01% were illiterate, and

144 the remainder held various qualifications. The one-way ANOVA analysis showed significant  
 145 differences in overall patient satisfaction levels across different socio-demographic and clinical  
 146 groups (Table 2).

147 **Table 2.** One-way ANOVA analysis of patient satisfaction (average score) across socio-  
 148 demographic and clinical variables.

| Variables           | Groups                               | Mean Score (SD)          | P-value |
|---------------------|--------------------------------------|--------------------------|---------|
| Patient type        | Inpatient (n=313)                    | 4.14 (0.73) <sup>a</sup> | <0.001  |
|                     | Outpatient (n=602)                   | 3.95 (0.62)              |         |
| Age                 | 18-44 years (n=647)                  | 3.96 (0.68) <sup>a</sup> | <0.001  |
|                     | 45-64 years (n=189)                  | 4.04 (0.65) <sup>a</sup> |         |
|                     | 65-74 years (n= 43)                  | 4.35 (0.51)              |         |
|                     | ≥75 years (n=36)                     | 4.44 (0.50)              |         |
| Sex                 | Male (n=396)                         | 3.98 (0.71) <sup>a</sup> | 0.218   |
|                     | Female (n=519)                       | 4.04 (0.63) <sup>a</sup> |         |
| Service utilisation | Once (n=289)                         | 4.00 (0.70) <sup>a</sup> | 0.666   |
|                     | More than once (n=626)               | 4.02 (0.65) <sup>a</sup> |         |
| Ethnic group        | Ngalop (n=70)                        | 3.76 (0.63) <sup>a</sup> | <0.001  |
|                     | Lhotshampa (n=209)                   | 3.94 (0.66) <sup>a</sup> |         |
|                     | Sharchop (n=522)                     | 4.06 (0.67)              |         |
|                     | Others (n=114)                       | 4.06 (0.66)              |         |
| Marital status      | Unmarried (n=179)                    | 3.85 (0.67)              | <0.001  |
|                     | Married (n=685)                      | 4.07 (0.66) <sup>a</sup> |         |
|                     | Divorced (n=33)                      | 3.80 (0.64) <sup>a</sup> |         |
|                     | Widowed (n=18)                       | 4.10 (0.78) <sup>a</sup> |         |
| Occupation          | Religious personnel (n=14)           | 4.44 (0.45)              | <0.001  |
|                     | Corporate (n=19)                     | 3.66 (0.49) <sup>a</sup> |         |
|                     | Student (n=77)                       | 3.89 (0.72) <sup>a</sup> |         |
|                     | Business (n=146)                     | 3.82 (0.68) <sup>a</sup> |         |
|                     | Civil servant (n=160)                | 3.83 (0.71) <sup>a</sup> |         |
|                     | Farmer (n=268)                       | 4.27 (0.55)              |         |
|                     | Others (n=231)                       | 4.03 (0.64)              |         |
| Education level     | Illiterate (n=238)                   | 4.29 (0.53)              | <0.001  |
|                     | Non-formal education (n=44)          | 4.10 (0.72) <sup>a</sup> |         |
|                     | Secondary education or lower (n=417) | 3.96 (0.65) <sup>a</sup> |         |
|                     | Certificate (n=29)                   | 3.80 (0.85) <sup>a</sup> |         |
|                     | Diploma (n=56)                       | 3.87 (0.68) <sup>a</sup> |         |
|                     | Bachelor (n=88)                      | 3.70 (0.75) <sup>a</sup> |         |
|                     | Master (n=11)                        | 3.77 (0.83) <sup>a</sup> |         |
|                     | Other qualifications (n=32)          | 4.01 (0.62) <sup>a</sup> |         |
| Centre              | MERRH (n=465)                        | 4.17 (0.62)              | <0.001  |
|                     | GCRRH (n=450)                        | 3.85 (0.67)              |         |

**Symbols:** <sup>a</sup> Grouping information using the Dunnnett method with 95% confidence. Means not labelled with the letter 'a' are significantly different from the control group's mean.



149

150 Patient satisfaction levels exhibited significant differences between inpatients and outpatients  
151 ( $P$ -value=  $<0.001$ ), with inpatients reporting higher satisfaction levels. Similarly, age was also  
152 identified as a significant factor influencing patient satisfaction level ( $P$ -value=  $<0.001$ ).  
153 Subsequent Dunnett multiple comparisons, using the 18-44 years age group as the control,  
154 showed that patient satisfaction levels for individuals aged 65 years and older differed  
155 significantly from the control group's mean.

156 Ethnicity also significantly influenced patient satisfaction levels ( $P$ -value=  $<0.001$ ). The  
157 comparisons, using the Ngalop group as the control, demonstrated significant differences in  
158 patient satisfaction levels for Sharchop and other ethnic groups compared to the control group's  
159 mean. Furthermore, marital status emerged as another significant factor influencing patient  
160 satisfaction level ( $P$ -value=  $<0.001$ ). Comparisons with the married group as a control indicated  
161 that only the unmarried group significantly differed from the control group's mean.

162 We also observed significant ( $P$ -value=  $<0.001$ ) differences in satisfaction levels among  
163 occupational groups. Comparisons with civil servants as a control showed significant differences  
164 from the control level mean for farmers, religious personnel, and others. Education level also  
165 played a significant role in influencing patient satisfaction level ( $P$ -value=  $<0.001$ ). Using the  
166 master's degree group as a control for comparisons, only the illiterate group showed a  
167 significant difference from the control level mean. Additionally, regarding center-wise  
168 comparisons, patients at MERRH reported significantly higher satisfaction levels than those at  
169 GCRRH ( $P$ -value =  $<0.001$ ). Among the variables, patient satisfaction levels did not show  
170 significant differences across sexes ( $P$ -value = 0.218) and different service utilisation groups ( $P$ -  
171 value= 0.666). The binary logistic regression analysis identified several significant predictors of  
172 patient satisfaction (Table 3).

173 **Table 3.** Analysis of patient satisfaction: Predictor effects using binary logistic regression.

| Predictor variables                                       | Odds Ratio | 95% CI for Odds Ratio | P-value |
|-----------------------------------------------------------|------------|-----------------------|---------|
| <b>Patient type</b>                                       |            |                       |         |
| Inpatient                                                 | 0.82       | 0.47-1.41             | 0.472   |
| Reference: Outpatient                                     |            |                       |         |
| <b>Age</b>                                                |            |                       |         |
| ≥65 years                                                 | 0.70       | 0.23- 2.18            | 0.553   |
| Reference: 18-64 years                                    |            |                       |         |
| <b>Sex</b>                                                |            |                       |         |
| Female                                                    | 1.67       | 1.04-2.69             | 0.034   |
| Reference: Male                                           |            |                       |         |
| <b>Service utilisation</b>                                |            |                       |         |
| More than once                                            | 1.31       | 0.79- 2.17            | 0.301   |
| Reference: Once                                           |            |                       |         |
| <b>Ethnic group</b>                                       |            |                       |         |
| Sharchop & Others                                         | 1.80       | 1.12-2.91             | 0.017   |
| Reference: Ngalop & Lhotshampa                            |            |                       |         |
| <b>Marital status</b>                                     |            |                       |         |
| Ever married                                              | 1.24       | 0.71-2.17             | 0.448   |
| Reference: Unmarried                                      |            |                       |         |
| <b>Occupation</b>                                         |            |                       |         |
| Farmer, religious personnel & others                      | 1.95       | 1.13-3.37             | 0.014   |
| Reference: Civil servant, business, student and corporate |            |                       |         |
| <b>Education level</b>                                    |            |                       |         |
| Illiterate                                                | 2.65       | 1.09- 6.42            | 0.021   |
| Reference: Literate                                       |            |                       |         |

174

175 Among the predictor variables, sex ( $P$ -value= 0.034), ethnicity ( $P$ -value= 0.017), occupation ( $P$ -

176 value= 0.014), and education level ( $P$ -value= 0.021) were found to be significant predictors of

177 satisfaction among Bhutanese patients. Female patients have higher odds of satisfaction (*odds*

178 *ratio* = 1.67, 95% CI: 1.04-2.69). Similarly, patients from Sharchop and other ethnic backgrounds

179 have higher odds of satisfaction (*odds ratio* = 1.80, 95% CI: 1.12-2.91). Furthermore, patients

180 involved in farming, religious services, or other occupations showed higher odds of satisfaction

181 (*odds ratio* = 1.95, 95% CI: 1.13-3.37), along with illiterate patients (*odds ratio* = 2.65, 95% CI:

182 1.09-6.42). Table 4 displays the domain-specific patient satisfaction levels across different

183 variables and groups.

184 **Table 4.** Descriptive statistics (mean [SD], minimum and maximum) of patient satisfaction across  
 185 multiple domains by various socio-demographic and clinical groups.

| Variables                                    | Domain 1               | Domain 2               | Domain 3               | Domain 4               | Domain 5               | Domain 6               | Domain 7               |
|----------------------------------------------|------------------------|------------------------|------------------------|------------------------|------------------------|------------------------|------------------------|
| <b>Patient type</b>                          |                        |                        |                        |                        |                        |                        |                        |
| Outpatient                                   | 4.10±0.85<br>(1.0-5.0) | 3.93±0.79<br>(1.3-5.0) | 4.05±0.89<br>(1.0-5.0) | 4.09±0.87<br>(1.0-5.0) | 4.35±0.83<br>(1.0-5.0) | 3.93±0.94<br>(1.0-5.0) | 3.60±0.82<br>(1.0-5.0) |
| Inpatient                                    | 4.15±0.91<br>(1.0-5.0) | 4.06±0.86<br>(1.0-5.0) | 4.24±0.96<br>(1.0-5.0) | 4.26±0.92<br>(1.0-5.0) | 4.38±0.91<br>(1.0-5.0) | 4.02±1.00<br>(1.0-5.0) | 4.04±0.84<br>(1.0-5.0) |
| <b>Age</b>                                   |                        |                        |                        |                        |                        |                        |                        |
| 18-64 years                                  | 4.10±0.88<br>(1.0-5.0) | 3.94±0.81<br>(1.0-5.0) | 4.08±0.93<br>(1.0-5.0) | 4.13±0.90<br>(1.0-5.0) | 4.33±0.87<br>(1.0-5.0) | 3.93±0.96<br>(1.0-5.0) | 3.70±0.85<br>(1.0-5.0) |
| ≥65 years                                    | 4.31±0.80<br>(2.0-5.0) | 4.33±0.81<br>(1.8-5.0) | 4.56±0.63<br>(3.0-5.0) | 4.40±0.81<br>(2.0-5.0) | 4.67±0.60<br>(3.0-5.0) | 4.37±0.86<br>(1.5-5.0) | 4.28±0.77<br>(2.0-5.0) |
| <b>Sex</b>                                   |                        |                        |                        |                        |                        |                        |                        |
| Male                                         | 4.06±0.91<br>(1.0-5.0) | 3.91±0.82<br>(1.3-5.0) | 4.09±0.97<br>(1.0-5.0) | 4.14±0.91<br>(1.0-5.0) | 4.30±0.90<br>(1.0-5.0) | 3.91±1.00<br>(1.0-5.0) | 3.76±0.89<br>(1.0-5.0) |
| Female                                       | 4.15±0.84<br>(1.5-5.0) | 4.02±0.81<br>(1.0-5.0) | 4.13±0.88<br>(1.0-5.0) | 4.16±0.88<br>(1.0-5.0) | 4.40±0.83<br>(1.0-5.0) | 4.01±0.93<br>(1.0-5.0) | 3.74±0.83<br>(1.0-5.0) |
| <b>Service utilisation</b>                   |                        |                        |                        |                        |                        |                        |                        |
| Once                                         | 4.08±0.89<br>(1.3-5.0) | 3.97±0.82<br>(1.0-5.0) | 4.10±0.96<br>(1.0-5.0) | 4.14±0.91<br>(1.0-5.0) | 4.26±0.92<br>(1.0-5.0) | 3.89±0.97<br>(1.0-5.0) | 3.80±0.89<br>(1.0-5.0) |
| More than once                               | 4.13±0.86<br>(1.5-5.0) | 3.97±0.81<br>(1.0-5.0) | 4.12±0.90<br>(1.0-5.0) | 4.16±0.88<br>(1.0-5.0) | 4.40±0.82<br>(1.0-5.0) | 4.00±0.96<br>(1.0-5.0) | 3.72±0.84<br>(1.0-5.0) |
| <b>Ethnicity</b>                             |                        |                        |                        |                        |                        |                        |                        |
| Ngalop & Lhotshampa                          | 3.95±0.87<br>(1.0-5.0) | 3.80±0.78<br>(1.3-5.0) | 4.00±0.90<br>(1.0-5.0) | 3.96±0.90<br>(1.0-5.0) | 4.30±0.86<br>(1.0-5.0) | 3.80±0.98<br>(1.0-5.0) | 3.74±0.82<br>(1.0-5.0) |
| Shar chop & others                           | 4.19±0.87<br>(1.0-5.0) | 4.05±0.82<br>(1.0-5.0) | 4.16±0.92<br>(1.0-5.0) | 4.23±0.87<br>(1.0-5.0) | 4.38±0.86<br>(1.0-5.0) | 4.04±0.95<br>(1.0-5.0) | 3.75±0.87<br>(1.0-5.0) |
| <b>Marital status</b>                        |                        |                        |                        |                        |                        |                        |                        |
| Unmarried                                    | 4.00±0.93<br>(1.5-5.0) | 3.77±0.84<br>(1.8-5.0) | 3.99±0.98<br>(1.0-5.0) | 4.03±0.89<br>(1.5-5.0) | 4.22±0.91<br>(1.0-5.0) | 3.85±0.96<br>(1.5-5.0) | 3.51±0.84<br>(1.0-5.0) |
| Ever married                                 | 4.14±0.86<br>(1.0-5.0) | 4.02±0.80<br>(1.0-5.0) | 4.14±0.90<br>(1.0-5.0) | 4.18±0.89<br>(1.0-5.0) | 4.39±0.84<br>(1.0-5.0) | 3.99±0.96<br>(1.0-5.0) | 3.80±0.85<br>(1.0-5.0) |
| <b>Occupation</b>                            |                        |                        |                        |                        |                        |                        |                        |
| Farmer, religious personnel & others         | 4.29±0.80<br>(1.0-5.0) | 4.16±0.76<br>(1.0-5.0) | 4.24±0.86<br>(1.0-5.0) | 4.27±0.84<br>(1.0-5.0) | 4.47±0.80<br>(1.0-5.0) | 4.16±0.91<br>(1.0-5.0) | 3.86±0.84<br>(1.0-5.0) |
| Civil servant, business, student & corporate | 3.90±0.92<br>(1.0-5.0) | 3.73±0.82<br>(1.0-5.0) | 3.95±0.96<br>(1.0-5.0) | 4.00±0.94<br>(1.0-5.0) | 4.22±0.91<br>(1.0-5.0) | 3.73±0.98<br>(1.0-5.0) | 3.60±0.85<br>(1.0-5.0) |
| <b>Education level</b>                       |                        |                        |                        |                        |                        |                        |                        |
| Illiterate                                   | 4.36±0.74<br>(2.0-5.0) | 4.33±0.67<br>(2.3-5.0) | 4.40±0.72<br>(2.0-5.0) | 4.37±0.79<br>(1.0-5.0) | 4.55±0.78<br>(1.0-5.0) | 4.30±0.82<br>(2.0-5.0) | 4.00±0.77<br>(2.0-5.0) |
| Literate                                     | 4.03±0.90<br>(1.0-5.0) | 3.85±0.82<br>(1.0-5.0) | 4.01±0.96<br>(1.0-5.0) | 4.07±0.91<br>(1.0-5.0) | 4.29±0.87<br>(1.0-5.0) | 3.85±0.98<br>(1.0-5.0) | 3.66±0.87<br>(1.0-5.0) |
| <b>Average</b>                               | 4.12 ±0.87             | 3.97±0.81              | 4.11 ±0.92             | 4.15 ±0.89             | 4.36 ±0.86             | 3.97 ±0.96             | 3.75±0.85              |

|                                                                                                                                                                                                                                      | (1.0-5.0) | (1.0-5.0) | (1.0-5.0) | (1.0-5.0) | (1.0-5.0) | (1.0-5.0) | (1.0-5.0) |
|--------------------------------------------------------------------------------------------------------------------------------------------------------------------------------------------------------------------------------------|-----------|-----------|-----------|-----------|-----------|-----------|-----------|
| <b>Domain 1, General Satisfaction; Domain 2, Technical Quality; Domain 3, Interpersonal Manner; Domain 4, Communication; Domain 5, Financial Aspects; Domain 6, Time spent with doctor; Domain 7, Accessibility and Convenience.</b> |           |           |           |           |           |           |           |

186

187 The overall patient satisfaction, computed as an average of all seven domains, is 4.06. The  
188 Financial domain achieved the highest score with an average of 4.36, whereas the accessibility  
189 and convenience domain received the lowest score with an average of 3.75.

## 190 Discussion

191 Patient satisfaction, despite its multifaceted, dynamic, and subjective nature, is widely regarded  
192 as a significant indicator of healthcare quality. This recognition is grounded in the  
193 acknowledgement that patients are the primary beneficiaries of healthcare interventions, thus  
194 rendering their satisfaction a fundamental metric in evaluating the excellence of healthcare  
195 services [14–16]. Aligned with this perspective, Bhutan vigorously implements the BHSQA and  
196 routinely evaluates patient satisfaction to ensure optimal healthcare quality. The patient  
197 satisfaction survey data of the MERRH and GCRRH captures patients from all major Bhutanese  
198 socio-demographic groups, thereby making the findings relevant for national healthcare policy  
199 and decision-making.

200 Our study showed that patients belonging to Sharchop and other ethnic groups; farmers,  
201 religious personnel, and other occupational groups, as well as illiterate groups, significantly  
202 exhibit higher levels of satisfaction and serve as significant predictors of satisfaction. Globally,  
203 patient satisfaction varies among different ethnic, occupational, and educational groups  
204 [14,15,17–30], highlighting the need for context-specific strategies to address disparities and  
205 improve overall patient satisfaction. Among Bhutanese ethnic groups, Sharchop individuals are  
206 generally considered sensitive, while Ngalops are perceived as assertive [31]. These differences  
207 in personality traits might have contributed to the difference in satisfaction levels observed

208 between Shar chop and Ngalop individuals. Similarly, educated populations, particularly those  
209 with exposure to superior services and familiarity with stringent quality standards, may harbour  
210 elevated expectations, potentially resulting in lower satisfaction levels. However, higher  
211 education can also foster a more profound understanding of healthcare system challenges,  
212 especially in developing countries, ultimately resulting in better satisfaction. While education  
213 level has the potential to influence patient satisfaction in both directions, in the Bhutanese  
214 context, our findings demonstrate a negative impact. Similar influences might have affected  
215 patient satisfaction across different occupational groups. Bhutan's literacy rate rose from 66.0%  
216 in 2017 to 70.2% in 2022 [32]. As the literacy rate improves, patient satisfaction may decline  
217 since the level of education appears to affect satisfaction inversely in Bhutan. Additionally,  
218 modernization is shifting people from farming and spirituality to modern lifestyles, potentially  
219 exacerbating this trend. Therefore, Bhutanese healthcare policy and decision-makers should  
220 proactively anticipate these changes and implement strategies to address potential challenges in  
221 the future.

222 The satisfaction level is significantly higher among inpatients, older adults, and ever-married  
223 groups compared to their counterparts; however, none of these groups are found to be  
224 significant predictors of satisfaction. This suggests that belonging to these categories may not  
225 significantly increase the likelihood of being satisfied when accounting for other variables.  
226 However, differences in analytical methodologies may also contribute to these observed  
227 discrepancies. Several prior studies reported varied findings, some aligning with ours, and others  
228 conflicting, leading to inconsistent conclusions on patient type, age, and marital status impact  
229 on patient satisfaction [14,15,17,20,26,29,33–38].

230 In our context, it is plausible that inpatients reported higher satisfaction levels due to the  
231 provision of more personalized care and supportive environments compared to outpatients. In

232 Bhutan, where elderly individuals are respected and exhibit spiritual tendencies, most  
233 experience a good quality of life [39]. This optimistic cultural atmosphere may have positively  
234 influenced the satisfaction level in our study. Furthermore, a study conducted in the USA found  
235 that physicians are more likely to engage in patient-centric encounters with older patients, who  
236 subsequently reported higher satisfaction levels [36]. This interpersonal dynamic might have  
237 additionally contributed to higher satisfaction levels among older adults in Bhutan.

238 Across nations and historical periods, married individuals generally tend to experience greater  
239 levels of happiness and satisfaction, although these emotions are subject to the dynamics within  
240 their relationships [40–42]. This heightened sense of contentment may extend to their  
241 encounters with healthcare services, positively influencing their perceptions and interactions,  
242 and ultimately contributing to higher satisfaction levels.

243 While satisfaction levels do not significantly differ between sexes in our study, females are 1.67  
244 times more likely to be satisfied with healthcare services than males. The existing literature  
245 presents mixed findings regarding the association between sex and patient satisfaction. Some  
246 studies report no differences, while others identify one sex as a predictor of higher satisfaction  
247 [15,18,26,34,35]. Some researchers suggest that women naturally have lower expectations  
248 compared to men, and this difference might have contributed to a greater likelihood of  
249 satisfaction among females [15,34]. While it is plausible that innate sex-related characteristics  
250 could influence satisfaction, in our context, the presence of healthcare programmes and services  
251 tailored for females might also have played a part in the observed higher likelihood of  
252 satisfaction.

253 In our analysis, we found no significant differences among various service utilization groups. This  
254 could be due to a consistent delivery of high-standard care by healthcare professionals  
255 regardless of visit frequency. Furthermore, the perception formed during the initial encounter

256 might exert a significant influence on subsequent perceptions, leading to consistent satisfaction  
257 levels. On the other hand, assessment tools may have lacked the sensitivity to detect subtle  
258 differences based on service utilization frequency. Overall, our study highlights the complex  
259 factors shaping patient satisfaction, emphasizing the need for further inquiry to meet the  
260 distinct needs of different patient groups.

261 The MERRH and GCRRH are both state-owned healthcare centres with comparable  
262 infrastructure and resources; nevertheless, patient satisfaction is significantly higher at MERRH.  
263 This difference might be attributed to the socio-demographic characteristics of the population  
264 served. MERRH, located in eastern Bhutan, predominantly serves Sharchop individuals, who are  
265 significantly more satisfied than the Lhotshampa individuals primarily served by GCRRH in south-  
266 central Bhutan.

267 Our study shows high overall satisfaction among Bhutanese patients across all seven domains.  
268 This finding highlights the concerted efforts of the Bhutanese healthcare system to ensure the  
269 provision of quality healthcare services through a comprehensive and systematic approach,  
270 including the vigorous implementation of the BHSQA. However, it is crucial to acknowledge that  
271 the surveys are administered by the quality unit of respective healthcare centres, potentially  
272 introducing a bias toward positive responses. Additionally, Bhutan's cultural context, deeply  
273 influenced by Buddhism, emphasizes compassion in all aspects of life, potentially increasing the  
274 likelihood of positive feedback over negative. These factors warrant careful consideration when  
275 interpreting the survey results and evaluating the true extent of patient satisfaction. For optimal  
276 service delivery, patients and healthcare professionals must share equal responsibility. In terms  
277 of service feedback, patients must provide truthful and reliable feedback, as misleading  
278 feedback could hinder opportunities for improvement and undermine the healthcare system.

279 Therefore, in Bhutan, concerned agencies, whether governmental or non-governmental, should  
280 promote honesty and accountability in feedback to optimally enhance healthcare services.

281 The Bhutanese patients are most satisfied in the financial domain, potentially due to Bhutan's  
282 provision of free healthcare services. A similar high satisfaction level in the financial domain has  
283 also been observed in other studies where healthcare is provided free [17,18]. The constitution  
284 of Bhutan mandates the state to provide free access to basic public health services, covering  
285 both modern and traditional medicine, for all citizens [43]. Accordingly, the Bhutanese  
286 healthcare system provides a broad range of services, including the ex-country referral of  
287 complex cases, free of cost. This mode of service delivery, which involves allocating limited  
288 financial, infrastructural, and human resources across a broad spectrum of services, can have  
289 adverse effects on both service sustainability and quality. While free healthcare services could  
290 be currently enhancing patient satisfaction levels in Bhutan, there is a risk of unsustainable  
291 expectations and strain on resources. It may induce the perception that all healthcare needs will  
292 be met without limits, ultimately impacting patient satisfaction levels. Given Bhutan's context,  
293 establishing dynamic limits of free services is crucial for ensuring sustainable delivery of quality  
294 services. Additionally, exploring private participation in delivering high-end services beyond the  
295 scope of state-owned centres could serve the public interest more effectively. The domains of  
296 general satisfaction, interpersonal manners, and communication also achieved high satisfaction  
297 levels, surpassing a rating of four. The inherent friendliness and compassion in Bhutanese  
298 society might have contributed to these positive outcomes. Furthermore, a study from Saudi  
299 Arabia has identified a positive correlation between financial aspects and other domains,  
300 including interpersonal manners and communication [17].

301 In our study, patients were least satisfied with accessibility and convenience, followed by time  
302 spent with doctors and technical quality. Although patient satisfaction varies across countries



303 due to cultural contexts, resource availability, and the effectiveness of the health system  
304 [15,19,44,45], studies have frequently reported dissatisfaction in these areas [18,20–  
305 22,33,46,47]. Bhutan has been facing an acute shortage of healthcare professionals for a long  
306 period of time. The current doctor-to-population ratio is 0.46 doctors per 1,000 individuals,  
307 below the WHO's recommended ratio of 1 per 1,000. Similarly, the nurse-to-population ratio is  
308 2.31 nurses per 1,000, falling short of the global average of 3.7 nurses per 1,000 [48,49]. To  
309 improve the specialist healthcare workforce in Bhutan, the Khesar Gyalpo University of Medical  
310 Sciences of Bhutan introduced its first Doctorate of Medicine courses in 2014, expanding to nine  
311 disciplines [50]. Nonetheless, there remains a significant shortage of specialists in the country.  
312 This scarcity might have contributed to lower satisfaction levels in these domains. To address  
313 this, policymakers and healthcare academic institutes should consider the expansion of training  
314 programmes, offering incentives, strengthening telemedicine, exploring role expansion,  
315 improving working conditions, promoting healthcare careers, and establishing a user-friendly  
316 online medical appointment system.

317 While patient satisfaction has demonstrated potential in identifying unmet patient needs and  
318 providing valuable insights for quality improvement, other studies have raised concerns about  
319 unintended effects associated with satisfaction surveys. These concerns have led to resistance  
320 from healthcare professionals, especially regarding their integration with compensation [51,52].  
321 In the US study, patient satisfaction surveys notably decreased physician job satisfaction,  
322 prompting some to consider leaving medicine and nearly half to believe it could lead to  
323 inappropriate care [53]. Patient satisfaction is crucial for healthcare delivery, yet ensuring the  
324 job satisfaction and security of healthcare professionals is equally vital. Hence, striking a balance  
325 between these factors and exercising caution in utilising patient satisfaction within established  
326 limits is imperative. In Bhutan, where the healthcare quality culture is still evolving, utilising

327 patient satisfaction for continuous quality improvement is sine qua non. However, policymakers  
328 must consider potential unintended consequences if it is used to evaluate healthcare  
329 professionals for any purpose.

330

## 331 **Conclusion**

332 Our study provides valuable insights into patient satisfaction levels and their predictors in  
333 Bhutan. We found that ethnicity, occupation, and education level were significant predictors of  
334 satisfaction. Specifically, Sharchop and other ethnic groups, farmers, religious personnel, and  
335 other occupational groups, as well as illiterate groups exhibited significantly higher satisfaction  
336 levels and were more likely to be satisfied with healthcare services. While the frequency of  
337 service utilisation doesn't influence patient satisfaction, variables such as patient type, age, and  
338 marital status influenced satisfaction levels. However, they did not emerge as significant  
339 predictors when considering other variables, indicating the complexity of patient satisfaction  
340 and the necessity of comprehensive analysis. With the anticipated changes in certain socio-  
341 demographic characteristics of the Bhutanese population, patient satisfaction is likely to decline.  
342 Therefore, healthcare policy and decision-makers should implement targeted interventions to  
343 address these shifts.

344 Bhutanese patients reported the highest satisfaction in the financial domain, reflecting the  
345 state's success in providing free healthcare services. Nonetheless, areas such as accessibility and  
346 convenience, time spent with doctors, and technical quality require improvement to enhance  
347 patient satisfaction. To address these challenges, implementing dynamic limits on free services,  
348 encouraging private participation for high-end services beyond the scope of state-owned

349 centres, strengthening the healthcare workforce, and embracing innovative approaches can  
350 help ensure sustainability and improve service quality.

351 As Bhutan's healthcare system evolves, leveraging patient satisfaction data for continuous  
352 quality improvement is crucial. However, a cautious approach is necessary to prevent  
353 unintended consequences that may affect healthcare professionals' morale and care standards.

354

## 355 **Acknowledgements**

356 We are thankful to the survey respondents for their participation and valuable feedback.  
357 Additionally, we are grateful to the hospital management of MERRH and GCRRH for their  
358 permission to access the archived patient satisfaction data.

## 359 **References**

- 360 1. Park HN, Park DJ, Han SY, Tae JY, Jung KH, Bae EJ, et al. Effect of inpatient experiences on patient  
361 satisfaction and the willingness to recommend a hospital: The mediating role of patient  
362 satisfaction: A cross-sectional study. *Health Sci Rep*. 2022 Nov;5(6):e925.
- 363 2. Ebn Ahmady A, Pakkhesal M, Zafarmand AH, Lando HA. Patient satisfaction surveys in dental  
364 school clinics: a review and comparison. *J Dent Educ*. 2015 Apr;79(4):388–93.
- 365 3. Schoenfelder T. Patient Satisfaction: A Valid Indicator for the Quality of Primary Care? *Primary*  
366 *Health Care: Open Access*. 2012 Aug 27;2:e106.
- 367 4. Kash B, McKahan M. The Evolution of Measuring Patient Satisfaction. 2017;1(1).
- 368 5. Al-Abri R, Al-Balushi A. Patient satisfaction survey as a tool towards quality improvement. *Oman*  
369 *Med J*. 2014 Jan;29(1):3–7.

- 370 6. Crow R, Gage H, Hampson S, Hart J, Kimber A, Storey L, et al. The measurement of satisfaction with  
371 healthcare: implications for practice from a systematic review of the literature. *Health Technol*  
372 *Assess.* 2002;6(32):1–244.
- 373 7. Grasso MS, Del Carmen Valls Martínez M, Ramírez-Orellana A. Health Policies Based on Patient  
374 Satisfaction: A Bibliometric Study. *Healthcare (Basel)*. 2021 Nov 8;9(11):1520.
- 375 8. Friedel AL, Siegel S, Kirstein CF, Gerigk M, Bingel U, Diehl A, et al. Measuring Patient Experience  
376 and Patient Satisfaction-How Are We Doing It and Why Does It Matter? A Comparison of European  
377 and U.S. American Approaches. *Healthcare (Basel)*. 2023 Mar 8;11(6):797.
- 378 9. Manzoor F, Wei L, Hussain A, Asif M, Shah SIA. Patient Satisfaction with Health Care Services; An  
379 Application of Physician’s Behavior as a Moderator. *Int J Environ Res Public Health*. 2019 Sep  
380 9;16(18):3318.
- 381 10. Guidelines for patient satisfaction questionnaire (WP7) [Internet]. DAYSAFE; 2013. Available from:  
382 [https://webgate.ec.europa.eu/chafea\\_pdb/assets/files/pdb/20091104/20091104\\_d09-](https://webgate.ec.europa.eu/chafea_pdb/assets/files/pdb/20091104/20091104_d09-00_en_ps.pdf)  
383 [00\\_en\\_ps.pdf](https://webgate.ec.europa.eu/chafea_pdb/assets/files/pdb/20091104/20091104_d09-00_en_ps.pdf)
- 384 11. National Health Policy [Internet]. Ministry of Health, Royal Government of Bhutan; 2015. Available  
385 from: [https://www.moh.gov.bt/wp-content/uploads/moh-files/2015/11/National-Health-](https://www.moh.gov.bt/wp-content/uploads/moh-files/2015/11/National-Health-Policy.pdf)  
386 [Policy.pdf](https://www.moh.gov.bt/wp-content/uploads/moh-files/2015/11/National-Health-Policy.pdf)
- 387 12. Thayaparan AJ, Mahdi E. The Patient Satisfaction Questionnaire Short Form (PSQ-18) as an  
388 adaptable, reliable, and validated tool for use in various settings. *Med Educ Online*. 2013 Jul  
389 23;18:21747.

- 390 13. Grant M, Hays R. The patient satisfaction questionnaire short form (PSQ-18) [Internet]. RAND;  
391 1994. Available from: <https://www.rand.org/content/dam/rand/pubs/papers/2006/P7865.pdf>
- 392 14. Cheruto B, Suge V, Nthenya J, Peinan C. Multifactorial Determinants of Patient Satisfaction Among  
393 Medical and Surgical Patients at Nakuru Level 5 Hospital Amidst the Covid-19 Pandemic: A Cross-  
394 Sectional Study. *East African Journal of Nursing*. 2023 Aug 17;1(01):1–12.
- 395 15. Akthar N, Nayak S, Pai P Y. Determinants of patient satisfaction in Asia: Evidence from systematic  
396 review of literature. *Clinical Epidemiology and Global Health*. 2023 Sep 1;23:101393.
- 397 16. Marcinowicz L, Chlabicz S, Grebowski R. Patient satisfaction with healthcare provided by family  
398 doctors: primary dimensions and an attempt at typology. *BMC Health Services Research*. 2009 Apr  
399 16;9(1):63.
- 400 17. Aljarallah NA, Almuqbil M, Alshehri S, Khormi AMS, AlReshaidan RM, Alomran FH, et al.  
401 Satisfaction of patients with health care services in tertiary care facilities of Riyadh, Saudi Arabia: A  
402 cross-sectional approach. *Front Public Health*. 2022;10:1077147.
- 403 18. Naeem B, Nasim J, Anwar A, Noor S, Arshad A, Khan MZ, et al. Assessment of parental satisfaction  
404 with paediatric health services in public sector tertiary hospitals within a low-income setting using  
405 Patient Satisfaction Questionnaire (PSQ-18). *BMJ Paediatrics Open*. 2024 Feb 1;8(1):e002418.
- 406 19. KANWAL K, RAFI Y, SARWAR MZ. Quality of Medical Care: Patient experiences and satisfaction at  
407 tertiary care setting in Public Hospital in Pakistan. *Age*. 2019;18(29):52.
- 408 20. Gaur BPS, Jahnvi G, Thatkar PV. Patient satisfaction about services obtained from a teaching  
409 hospital, Port Blair: A cross-sectional study. *J Family Med Prim Care*. 2020 Jan;9(1):93–8.

- 410 21. Chakraborty SN, Bhattacharjee S, Rahaman MA. A cross-sectional study on patient satisfaction in  
411 an Urban Health Care Centre of Siliguri Municipal Corporation, Darjeeling, West Bengal. Medical  
412 Journal of Dr DY Patil University. 2016 Jun;9(3):325.
- 413 22. Poudel L, Baskota S, Mali P, Pradhananga P, Malla N, Rajbhandari B, et al. Patient Satisfaction in  
414 Out-patient Services at a Tertiary Care Center: A Descriptive Cross-sectional Study. JNMA J Nepal  
415 Med Assoc. 2020 May 30;58(225):301–5.
- 416 23. Magadi JP, Magadi MA. Ethnic inequalities in patient satisfaction with primary health care in  
417 England: Evidence from recent General Practitioner Patient Surveys (GPPS). PLoS One. 2022 Dec  
418 21;17(12):e0270775.
- 419 24. Liao L, Chung S, Altamirano J, Garcia L, Fassiotto M, Maldonado B, et al. The association between  
420 Asian patient race/ethnicity and lower satisfaction scores. BMC Health Services Research. 2020 Jul  
421 22;20(1):678.
- 422 25. Snigdha SA, Alam MM, Dilshad S, Salam SA, Biswas A, Hossain Hawlader MD. Level of patient  
423 satisfaction at government Unani & Ayurvedic Medical College Hospital in Dhaka, Bangladesh.  
424 Public Health Pract (Oxf). 2020 Aug 21;1:100037.
- 425 26. Adhikari M, Paudel NR, Mishra SR, Shrestha A, Upadhyaya DP. Patient satisfaction and its socio-  
426 demographic correlates in a tertiary public hospital in Nepal: a cross-sectional study. BMC Health  
427 Services Research. 2021 Feb 12;21(1):135.
- 428 27. Lyratzopoulos G, Elliott M, Barbiere JM, Henderson A, Staetsky L, Paddison C, et al. Understanding  
429 ethnic and other socio-demographic differences in patient experience of primary care: evidence  
430 from the English General Practice Patient Survey. BMJ Qual Saf. 2012 Jan 1;21(1):21–9.

- 431 28. Akuamoah-Boateng J. Patients' Satisfaction and its Determinants in Outpatient and Inpatient  
432 Departments of Tertiary Hospitals in Ghana: Case Study of Greater Accra Regional Hospital. In 2019  
433 [cited 2024 May 30]. Available from:  
434 [https://www.semanticscholar.org/paper/Patients%E2%80%99-Satisfaction-and-its-Determinants-](https://www.semanticscholar.org/paper/Patients%E2%80%99-Satisfaction-and-its-Determinants-in-and-Akuamoah-Boateng/f513c49689a7aabcc600e7878a20a95b06dea908)  
435 [in-and-Akuamoah-Boateng/f513c49689a7aabcc600e7878a20a95b06dea908](https://www.semanticscholar.org/paper/Patients%E2%80%99-Satisfaction-and-its-Determinants-in-and-Akuamoah-Boateng/f513c49689a7aabcc600e7878a20a95b06dea908)
- 436 29. Afzal M, Rizvi F, Azad AH, Rajput AM, Khan A, Tariq N. Effect of demographic characteristics on  
437 patient's satisfaction with health care facility. *Journal of Postgraduate Medical Institute* [Internet].  
438 2014 Apr 17 [cited 2024 May 29];28(2). Available from:  
439 <https://www.jpmi.org.pk/index.php/jpmi/article/view/1528>
- 440 30. Woods SE, Bivins R, Oteng K, Engel A. The influence of ethnicity on patient satisfaction. *Ethn*  
441 *Health*. 2005 Aug;10(3):235–42.
- 442 31. Monaco E. Preserving Bhutan's National Identity: An Analysis of Gross National Happiness as  
443 Survival Strategy. *European Journal of Sustainable Development*. 2017 Oct 1;6(3):81–81.
- 444 32. BLSS Reports – National Statistics Bureau [Internet]. [cited 2024 May 31]. Available from:  
445 <https://www.nsb.gov.bt/publications/bhutan-living-standard-survey-report/>
- 446 33. Sakti DH, Firdaus AT, Utami TP, Jati KDP, Mahayana IT, Wardhana FS, et al. Patients' Satisfaction  
447 with Ophthalmology Clinic Services in a Public Teaching Hospital. *Patient Prefer Adherence*.  
448 2022;16:723–35.
- 449 34. Liang H, Xue Y, Zhang Z ruo. Patient satisfaction in China: a national survey of inpatients and  
450 outpatients. *BMJ Open*. 2021 Sep 1;11(9):e049570.

- 451 35. Hwang J, Vu GT, Tran BX, Nguyen THT, Nguyen BV, Nguyen LH, et al. Measuring satisfaction with  
452 health care services for Vietnamese patients with cardiovascular diseases. PLoS One. 2020 Jun  
453 25;15(6):e0235333.
- 454 36. Peck BM. Age-Related Differences in Doctor-Patient Interaction and Patient Satisfaction. Current  
455 Gerontology and Geriatrics Research. 2011 Oct 5;2011:e137492.
- 456 37. Rahmqvist M. Patient satisfaction in relation to age, health status and other background factors: a  
457 model for comparisons of care units. Int J Qual Health Care. 2001 Oct;13(5):385–90.
- 458 38. Jaipaul CK, Rosenthal GE. Are Older Patients More Satisfied With Hospital Care Than Younger  
459 Patients? J Gen Intern Med. 2003 Jan;18(1):23–30.
- 460 39. Dorji N, Dunne MP, Seib C, Deb S. Qualitative Inquiry into Quality of Life among Older Adults in  
461 Bhutan. BJSTR. 2018 Jun 19;5(4):001–8.
- 462 40. Stutzer A, Frey BS. Does marriage make people happy, or do happy people get married? The  
463 Journal of Socio-Economics. 2006 Apr 1;35(2):326–47.
- 464 41. Mäki M, Hägglund AE, Rotkirch A, Kulathinal S, Myrskylä M. Stable marital histories predict  
465 happiness and health across educational groups. MPIDR Working Papers [Internet]. 2022 [cited  
466 2024 May 31]; Available from: <https://ideas.repec.org/p/dem/wpaper/wp-2022-035.html>
- 467 42. Chapman B, Guven C. Marital Status is Misunderstood in Happiness Models. Deakin University,  
468 Faculty of Business and Law, School of Accounting, Economics and Finance, Economics Series. 2010  
469 Jan 1;



- 470 43. <https://parliament.bt>. The Constitution of the Kingdom of Bhutan [Internet]. Parliament of Bhutan.  
471 [cited 2024 May 26]. Available from: [https://parliament.bt/the-constitution-of-the-kingdom-of-](https://parliament.bt/the-constitution-of-the-kingdom-of-bhutan)  
472 bhutan
- 473 44. Gavurova B, Dvorsky J, Popesko B. Patient Satisfaction Determinants of Inpatient Healthcare. *Int J*  
474 *Environ Res Public Health*. 2021 Oct 28;18(21):11337.
- 475 45. Dinsa K, Deressa BG, Salgado WB. Comparison of Patients Satisfaction Levels Toward Nursing Care  
476 in Public and Private Hospitals, Jimma, Ethiopia. *NRR*. 2022 Sep 25;12:177–89.
- 477 46. Agarwal P, Biswas R. Satisfaction of patients attending a rural hospital of Darjeeling district in West  
478 Bengal, India. *International Journal Of Community Medicine And Public Health*. 2017 May  
479 22;4(6):1932–7.
- 480 47. Kavalnienė R, Deksnys A, Kasiulevičius V, Šapoka V, Aranauskas R, Aranauskas L. Patient  
481 satisfaction with primary healthcare services: are there any links with patients' symptoms of  
482 anxiety and depression? *BMC Fam Pract*. 2018 Jun 19;19:90.
- 483 48. Annual Health Bulletin | Ministry of Health [Internet]. [cited 2024 May 27]. Available from:  
484 [https://www.moh.gov.bt/about/program-profiles/national-suicide-prevention-program/plans-](https://www.moh.gov.bt/about/program-profiles/national-suicide-prevention-program/plans-orders-activities/reports__trashed/annual-health-bulletin/)  
485 [orders-activities/reports\\_\\_trashed/annual-health-bulletin/](https://www.moh.gov.bt/about/program-profiles/national-suicide-prevention-program/plans-orders-activities/reports__trashed/annual-health-bulletin/)
- 486 49. Countries in WHO South-East Asia Region need 1.9 million more nurses, midwives to achieve  
487 health for all [Internet]. [cited 2024 May 27]. Available from:  
488 [https://www.who.int/southeastasia/news/detail/07-04-2020-countries-in-who-south-east-asia-](https://www.who.int/southeastasia/news/detail/07-04-2020-countries-in-who-south-east-asia-region-need-1.9-million-more-nurses-midwives-to-achieve-health-for-all)  
489 [region-need-1.9-million-more-nurses-midwives-to-achieve-health-for-all](https://www.who.int/southeastasia/news/detail/07-04-2020-countries-in-who-south-east-asia-region-need-1.9-million-more-nurses-midwives-to-achieve-health-for-all)

- 490 50. Faculty of Postgraduate Medicine [Internet]. [cited 2024 May 27]. Available from:  
491 <https://fopgm.edu.bt/detail/milestone>
- 492 51. The Patient Experience and Health Outcomes | New England Journal of Medicine [Internet]. [cited  
493 2024 May 25]. Available from: <https://www.nejm.org/doi/full/10.1056/NEJMp1211775>
- 494 52. Mehta SJ. Patient Satisfaction Reporting and Its Implications for Patient Care. *AMA Journal of*  
495 *Ethics*. 2015 Jul 1;17(7):616–21.
- 496 53. Zgierska A, Rabago D, Miller MM. Impact of patient satisfaction ratings on physicians and clinical  
497 care. *Patient Prefer Adherence*. 2014 Apr 3;8:437–46.
- 498
